# Supplementary material for: Heteroctanuclear Au4Ag4 Cluster Complexes of 4,5-Diethynylacridin-9-One with Luminescent Mechanochromism
Source: MDPI journal article supplement (doi:10.3390/molecules27072127), 2022-03-25
Supplement: s1 [file s1]

# Supporting Information

## **Heterooctanuclear $\text{Au}_4\text{Ag}_4$ Cluster Complexes of 4,5-Diethynylacridin-9-One with Luminescent Mechanochromism**

Pei Xie <sup>1,2</sup>, Jin-Yun Wang <sup>2</sup>, Ya-Zi Huang <sup>2</sup>, Xue-Meng Wu <sup>2</sup> and Zhong-Ning Chen <sup>1,2,3,\*</sup>

<sup>1</sup> *College of Chemistry, Fuzhou University, Fuzhou, Fujian 350108, China*

<sup>2</sup> *State Key Laboratory of Structural Chemistry, Fujian Institute of Research on the Structure of Matter, Chinese Academy of Sciences, Fuzhou, Fujian 350002, China*

<sup>3</sup> *Fujian Science & Technology Innovation Laboratory for Optoelectronic Information of China, Fuzhou, Fujian 350108, China*

**Table S1.** Crystallographic Data for Au<sub>4</sub>Ag<sub>4</sub> Cluster Complexes **1** and **2**.

|                                                         | <b>1</b>                                                                                                       | <b>2</b>                                                                                                       |
|---------------------------------------------------------|----------------------------------------------------------------------------------------------------------------|----------------------------------------------------------------------------------------------------------------|
| empirical formula                                       | C <sub>172</sub> H <sub>152</sub> Ag <sub>4</sub> Au <sub>4</sub> N <sub>4</sub> O <sub>4</sub> P <sub>4</sub> | C <sub>168</sub> H <sub>148</sub> Ag <sub>4</sub> Au <sub>4</sub> N <sub>8</sub> O <sub>4</sub> P <sub>4</sub> |
| formula weight                                          | 3682.19                                                                                                        | 3686.16                                                                                                        |
| crystal system                                          | monoclinic                                                                                                     | monoclinic                                                                                                     |
| space group                                             | <i>C2/c</i>                                                                                                    | <i>C2/c</i>                                                                                                    |
| <i>a</i> (Å)                                            | 18.4728(11)                                                                                                    | 19.009(4)                                                                                                      |
| <i>b</i> (Å)                                            | 39.030(2)                                                                                                      | 38.632(8)                                                                                                      |
| <i>c</i> (Å)                                            | 23.4922(11)                                                                                                    | 23.355(5)                                                                                                      |
| $\beta$ (deg)                                           | 91.422(2)                                                                                                      | 93.807(9)                                                                                                      |
| <i>V</i> (Å <sup>3</sup> )                              | 16932.4(16)                                                                                                    | 17113(6)                                                                                                       |
| <i>Z</i>                                                | 4                                                                                                              | 4                                                                                                              |
| <i>F</i> (000)                                          | 7232.0                                                                                                         | 7232.0                                                                                                         |
| completeness                                            | 0.995                                                                                                          | 0.993                                                                                                          |
| $\rho_{\text{calcd}}$ (g/cm <sup>3</sup> )              | 1.444                                                                                                          | 1.431                                                                                                          |
| $\mu$ (mm <sup>-1</sup> )                               | 3.991                                                                                                          | 3.950                                                                                                          |
| radiation ( $\lambda$ , Å)                              | 0.71073                                                                                                        | 0.71073                                                                                                        |
| temperature (K)                                         | 150                                                                                                            | 150                                                                                                            |
| GOF                                                     | 1.019                                                                                                          | 1.083                                                                                                          |
| R1 ( <i>F</i> <sub>o</sub> ) <sup>a</sup>               | 0.0478(10392)                                                                                                  | 0.0312(14627)                                                                                                  |
| wR2 ( <i>F</i> <sub>o</sub> <sup>2</sup> ) <sup>b</sup> | 0.1469(15516)                                                                                                  | 0.1163(17428)                                                                                                  |

$$^a \text{R1} = \Sigma |F_o - F_c| / \Sigma F_o \quad ^b \text{wR2} = \Sigma [w(F_o^2 - F_c^2)^2] / \Sigma [w(F_o^2)]^{1/2}$$

**Table S2.** Selective Interatomic Distances (Å) and Bonding Angles (°) of Au<sub>4</sub>Ag<sub>4</sub> Cluster Complex **1**.

| interatomic distance |            |             |           |
|----------------------|------------|-------------|-----------|
| Au1-Au1a             | 3.1980(7)  |             |           |
| Au1-Ag2              | 2.9464(7)  | Au2-Ag1     | 2.9159(8) |
| Au1-Ag1              | 3.0269(7)  | Au2-Ag2     | 2.8556(8) |
| Au1-C41              | 1.986(9)   | Au2-C26     | 1.962(9)  |
| Au1-C1               | 2.020(9)   | Au2-C17     | 1.994(9)  |
| Ag1-C40              | 2.701(8)   | Ag2-C1      | 2.348(8)  |
| Ag2-C2               | 2.625(9)   | Ag2-C17     | 2.401(8)  |
| Ag1-C26              | 2.357(10)  | Ag1-C41     | 2.381(8)  |
| bonding angle        |            |             |           |
| Ag2-Au2-Ag1          | 129.26(2)  | Ag2-Au1-Ag1 | 164.23(2) |
| Au2-Ag1-Au1          | 80.977(18) | Ag1-Au1-Au1 | 102.88(2) |
| Ag2-Au1-Au1          | 92.520(17) | Au2-Ag2-Au1 | 91.17(2)  |
| C41-Au1-C1           | 174.3(4)   | C26-Au2-C17 | 174.4(4)  |

**Table S3.** Selective Interatomic Distances (Å) and Bond Angles (°) of Au<sub>4</sub>Ag<sub>4</sub> Cluster Complex **2**.

| interatomic distance |             |             |            |
|----------------------|-------------|-------------|------------|
| Au1-Au1a             | 3.2384(7)   |             |            |
| Au1-Ag1              | 2.9963(6)   | Au2-Ag1     | 2.8455(6)  |
| Au1-Ag2              | 3.0488(6)   | Au2-Ag2     | 2.8853(5)  |
| Au1-C1               | 1.998(5)    | Au2-C17     | 1.994(5)   |
| Au1-C26              | 2.005(5)    | Au2-C49     | 1.995(5)   |
| Ag1-C26              | 2.372(4)    | Ag2-C1      | 2.386(4)   |
| Ag1-C49              | 2.428(4)    | Ag2-C2      | 2.641(4)   |
| Ag1-C27              | 2.618(4)    | Ag2-C17     | 2.363(5)   |
| bond angle           |             |             |            |
| Ag1-Au2-Ag2          | 135.120(13) | Au2-Ag1-Au1 | 87.214(17) |
| Ag1-Au1-Ag2          | 162.989(12) | Ag1-Au1-Au1 | 95.283(17) |
| Ag2-Au1-Au1          | 101.564(17) | Au2-Ag2-Au1 | 79.815(17) |
| C1-Au1-C26           | 174.1(2)    | C49-Au2-C17 | 174.18(19) |

**Table S4.** The Partial Molecular Orbital Compositions (%) by SCPA Approach in the Ground State and the Absorption Transitions for Complex **1** in CH<sub>2</sub>Cl<sub>2</sub> Solution, Calculated by TD-DFT Method at the PBE1PBE-GD3 Level.

| orbital | energy<br>(eV) | MO contribution (%) |                 |       |             |                  |
|---------|----------------|---------------------|-----------------|-------|-------------|------------------|
|         |                | Au (s/p/d)          | Ag (s/p/d)      | two L | other two L | PPh <sub>3</sub> |
| LUMO+3  | -1.82          | 11.35 (7/86/7)      | 11.53 (27/66/7) | 41.11 | 34.67       | 1.34             |
| LUMO+2  | -1.83          | 31.96 (67/29/4)     | 25.76 (65/34/1) | 27.42 | 13.49       | 1.36             |
| LUMO+1  | -1.87          | 8.58 (43/51/6)      | 25.83 (57/41/3) | 28.87 | 34.08       | 2.63             |
| LUMO    | -1.96          | 13.43 (6/88/6)      | 24.81 (48/50/2) | 15.87 | 39.53       | 6.35             |
| HOMO    | -5.53          | 8.21 (15/19/66)     | 11.02 (7/17/76) | 65.75 | 6.82        | 8.20             |
| HOMO-2  | -5.76          | 23.34 (22/66/12)    | 8.82 (26/56/17) | 63.23 | 1.34        | 3.26             |
| HOMO-3  | -5.85          | 16.80 (12/67/21)    | 6.35 (44/34/22) | 1.68  | 73.79       | 1.37             |

  

| state           | <i>E</i> , nm (eV) | O.S.   | transition (contrib.)                                         | assignment                                                                                                                                                        | measured (nm) |
|-----------------|--------------------|--------|---------------------------------------------------------------|-------------------------------------------------------------------------------------------------------------------------------------------------------------------|---------------|
| S <sub>1</sub>  | 420 (2.95)         | 0.0194 | HOMO→LUMO (62%)<br>HOMO→LUMO+2 (23%)                          | <sup>1</sup> LLCT/ <sup>1</sup> MC/ <sup>1</sup> IL<br><sup>1</sup> LMCT/ <sup>1</sup> IL/ <sup>1</sup> MC                                                        | 443           |
| S <sub>5</sub>  | 405 (3.06)         | 0.4018 | HOMO→LUMO+1 (59%)<br>HOMO→LUMO+3 (26%)                        | <sup>1</sup> IL/ <sup>1</sup> LLCT/ <sup>1</sup> MC<br><sup>1</sup> IL/ <sup>1</sup> LLCT/ <sup>1</sup> MC                                                        | 424           |
| S <sub>10</sub> | 385 (3.22)         | 0.4338 | HOMO-3→LUMO (29%)<br>HOMO-2→LUMO (29%)<br>HOMO-2→LUMO+2 (28%) | <sup>1</sup> IL/ <sup>1</sup> MC/ <sup>1</sup> LMCT<br><sup>1</sup> LLCT/ <sup>1</sup> MC/ <sup>1</sup> IL<br><sup>1</sup> MC/ <sup>1</sup> IL/ <sup>1</sup> LMCT |               |

**Table S5.** The Partial Molecular Orbital Compositions (%) by SCPA Approach in the Lowest-Energy Triplet State and the Emission Transitions for Complex **1** in CH<sub>2</sub>Cl<sub>2</sub> Solution, Calculated by TD-DFT Method at the PBE1PBE-GD3 Level.

| orbital | energy<br>(eV) | MO contribution (%) |                  |       |             |                  |
|---------|----------------|---------------------|------------------|-------|-------------|------------------|
|         |                | Au (s/p/d)          | Ag (s/p/d)       | two L | other two L | PPh <sub>3</sub> |
| LUMO+1  | -1.90          | 15.47 (57/38/5)     | 27.46 (65/33/2)  | 15.19 | 38.98       | 2.88             |
| LUMO    | -2.05          | 19.59 (26/68/6)     | 25.72 (44/53/3)  | 37.13 | 12.18       | 5.38             |
| HOMO    | -5.34          | 7.34 (11/20/69)     | 11.05 (11/18/71) | 73.55 | 1.70        | 6.36             |

  

| state          | <i>E</i> , nm (eV) | O.S.   | transition (contrib.)                | assignment                                                                                                 | measured (nm) |
|----------------|--------------------|--------|--------------------------------------|------------------------------------------------------------------------------------------------------------|---------------|
| T <sub>1</sub> | 659 (1.88)         | 0.0000 | HOMO→LUMO (52%)<br>HOMO→LUMO+1 (11%) | <sup>3</sup> IL/ <sup>3</sup> LMCT/ <sup>3</sup> MC<br><sup>3</sup> IL/ <sup>3</sup> LMCT/ <sup>3</sup> MC | 650           |

**Table S6.** The Partial Molecular Orbital Compositions (%) by SCPA Approach in the Ground State and the Absorption Transitions for Complex **2** in CH<sub>2</sub>Cl<sub>2</sub> Solution, Calculated by TD-DFT Method at the PBE1PBE-GD3 Level.

| orbital | energy<br>(eV) | MO Contribution (%) |                  |       |             |                     |
|---------|----------------|---------------------|------------------|-------|-------------|---------------------|
|         |                | Au (s/p/d)          | Ag (s/p/d)       | two L | other two L | PPh <sub>2</sub> Py |
| LUMO+3  | -1.82          | 26.26 (12/78/11)    | 18.25 (37/54/9)  | 23.13 | 19.73       | 12.63               |
| LUMO+1  | -1.89          | 26.53 (63/33/4)     | 28.56 (64/35/1)  | 36.35 | 6.48        | 2.09                |
| LUMO    | -1.99          | 23.05 (69/28/3)     | 26.22 (66/32/2)  | 5.70  | 40.09       | 4.94                |
| HOMO    | -5.58          | 9.53 (9/26/64)      | 8.41 (22/15/63)  | 61.40 | 15.23       | 5.42                |
| HOMO-1  | -5.70          | 14.08 (38/34/29)    | 12.14 (29/20/51) | 14.36 | 52.15       | 7.28                |
| HOMO-2  | -5.82          | 25.58 (12/75/13)    | 9.97 (40/49/11)  | 32.80 | 29.49       | 2.16                |
| HOMO-3  | -5.84          | 20.63 (59/23/18)    | 6.00 (14/58/28)  | 34.94 | 36.28       | 2.16                |

  

| state          | <i>E</i> , nm (eV) | O.S.   | transition (contrib.)                                           | assignment                                                                                                                                                            | measured<br>(nm) |
|----------------|--------------------|--------|-----------------------------------------------------------------|-----------------------------------------------------------------------------------------------------------------------------------------------------------------------|------------------|
| S <sub>1</sub> | 417 (2.97)         | 0.0269 | HOMO→LUMO+1 (47%)<br>HOMO→LUMO (37%)<br>HOMO-1→LUMO+1 (10%)     | <sup>1</sup> LMCT/ <sup>1</sup> IL/ <sup>1</sup> MC<br><sup>1</sup> LMCT/ <sup>1</sup> LLCT/ <sup>1</sup> MC<br><sup>1</sup> LMCT/ <sup>1</sup> MC/ <sup>1</sup> LLCT | 445              |
| S <sub>5</sub> | 395 (3.14)         | 0.3837 | HOMO-2→LUMO (28%)<br>HOMO-3→LUMO (25%)<br>HOMO-1→LUMO+3 (17%)   | <sup>1</sup> MC/ <sup>1</sup> IL/ <sup>1</sup> LMCT<br><sup>1</sup> IL/ <sup>1</sup> MC/ <sup>1</sup> LMCT<br><sup>1</sup> IL/ <sup>1</sup> MC/ <sup>1</sup> LMCT     | 424              |
| S <sub>9</sub> | 383 (3.24)         | 0.4324 | HOMO-2→LUMO+1 (41%)<br>HOMO-3→LUMO+1 (29%)<br>HOMO-3→LUMO (15%) | <sup>1</sup> MC/ <sup>1</sup> IL/ <sup>1</sup> LMCT<br><sup>1</sup> IL/ <sup>1</sup> LMCT/ <sup>1</sup> MC<br><sup>1</sup> IL/ <sup>1</sup> MC/ <sup>1</sup> LMCT     |                  |

**Table S7.** The Partial Molecular Orbital Compositions (%) by SCPA Approach in the Lowest-Energy Triplet State and the Emission Transitions for Complex **2** in CH<sub>2</sub>Cl<sub>2</sub> Solution, Calculated by TD-DFT Method at the PBE1PBE-GD3 Level.

| orbital | energy<br>(eV) | MO contribution (%) |                 |       |             |                     |
|---------|----------------|---------------------|-----------------|-------|-------------|---------------------|
|         |                | Au (s/p/d)          | Ag (s/p/d)      | two L | other two L | PPh <sub>2</sub> Py |
| LUMO    | -2.08          | 15.96 (20/72/8)     | 22.75 (46/51/2) | 49.59 | 6.79        | 4.91                |
| HOMO    | -5.42          | 8.54 (6/28/66)      | 8.86 (17/23/60) | 74.92 | 3.52        | 4.17                |

  

| state          | <i>E</i> , nm (eV) | O.S.   | transition (contrib.) | assignment                                          | measured (nm) |
|----------------|--------------------|--------|-----------------------|-----------------------------------------------------|---------------|
| T <sub>1</sub> | 656 (1.89)         | 0.0000 | HOMO→LUMO (58%)       | <sup>3</sup> IL/ <sup>3</sup> LMCT/ <sup>3</sup> MC | 630           |

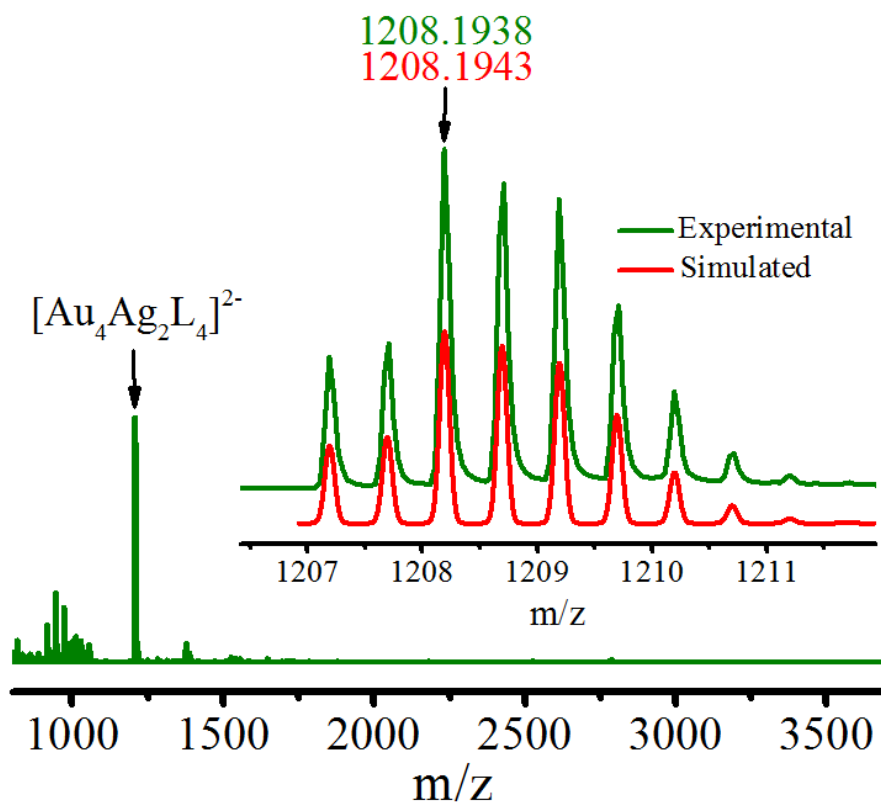

**Figure S1.** The high-resolution mass spectrometry of complex 1. Inset: The measured and simulated isotopic patterns.

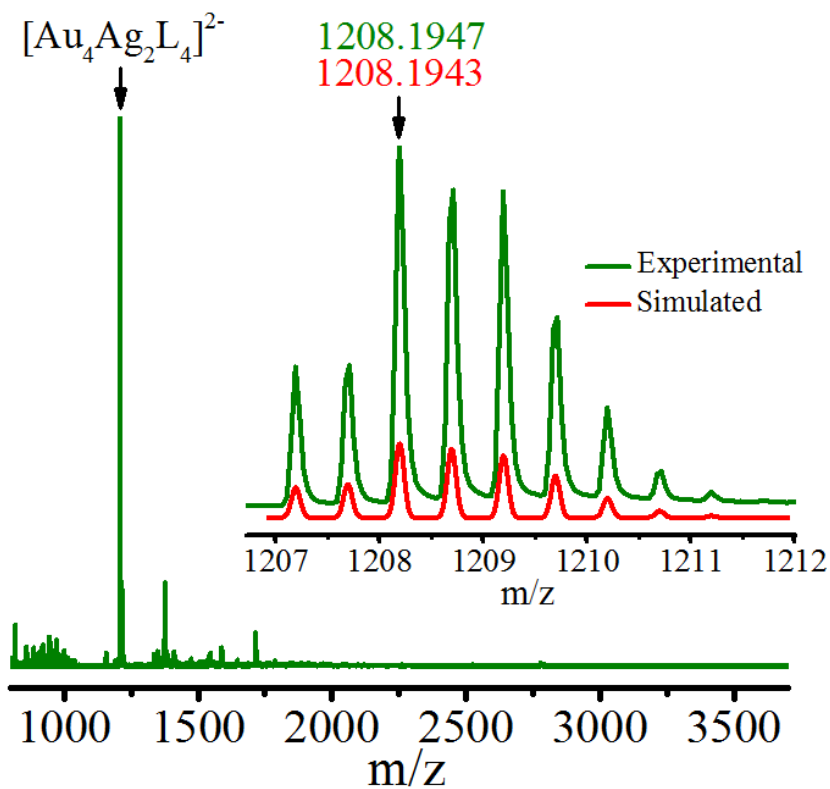

**Figure S2.** The high-resolution mass spectrometry of complex 2. Inset: The measured and simulated isotopic patterns.

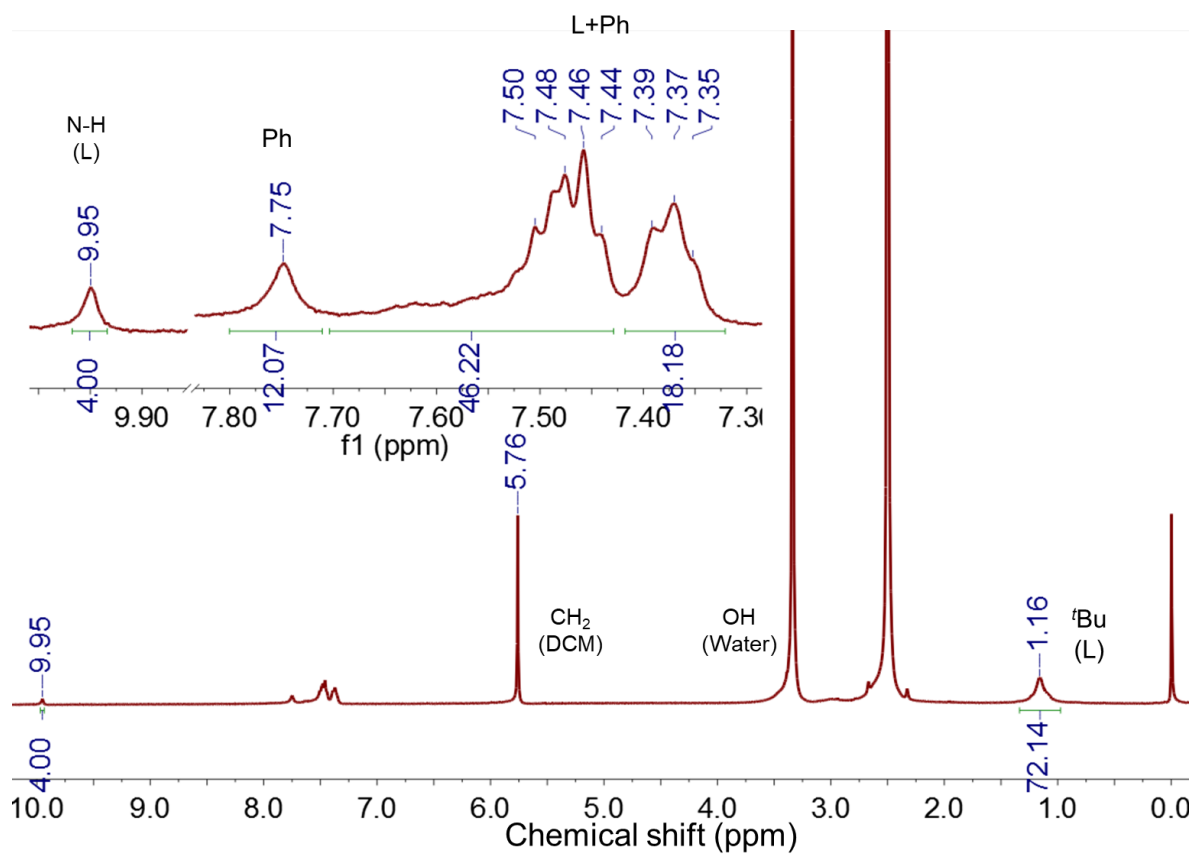

**Figure S3.** The <sup>1</sup>H NMR spectrum of complex **1** in DMSO-*d*<sub>6</sub> solution at ambient temperature.

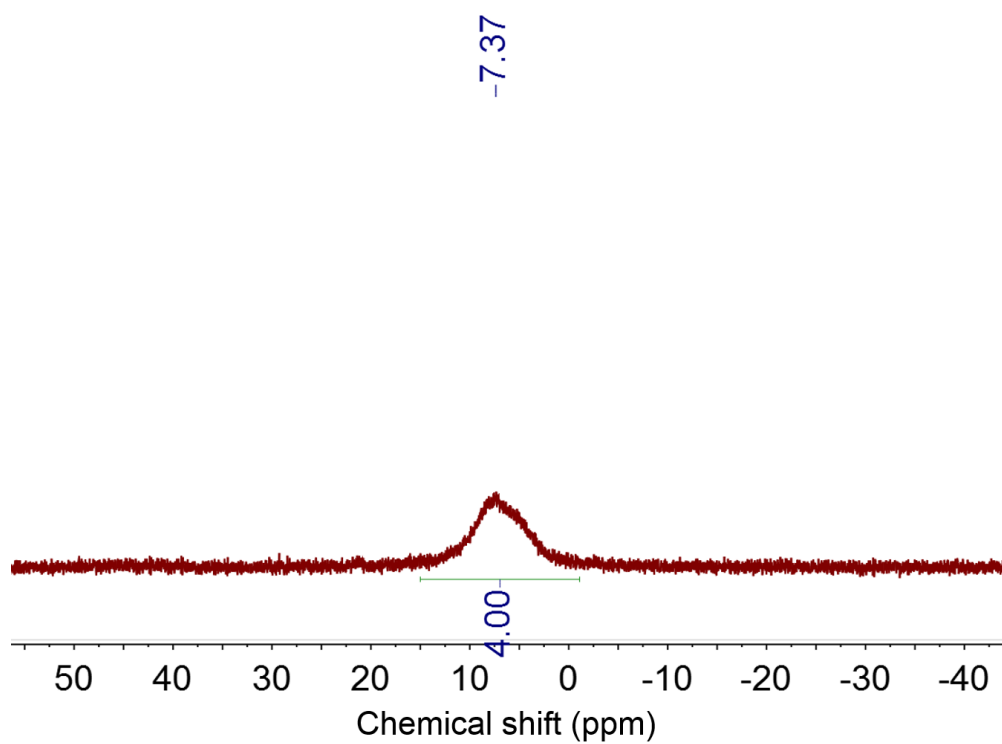

**Figure S4.** The <sup>31</sup>P NMR spectrum of complex **1** in DMSO-*d*<sub>6</sub> solution at ambient temperature.

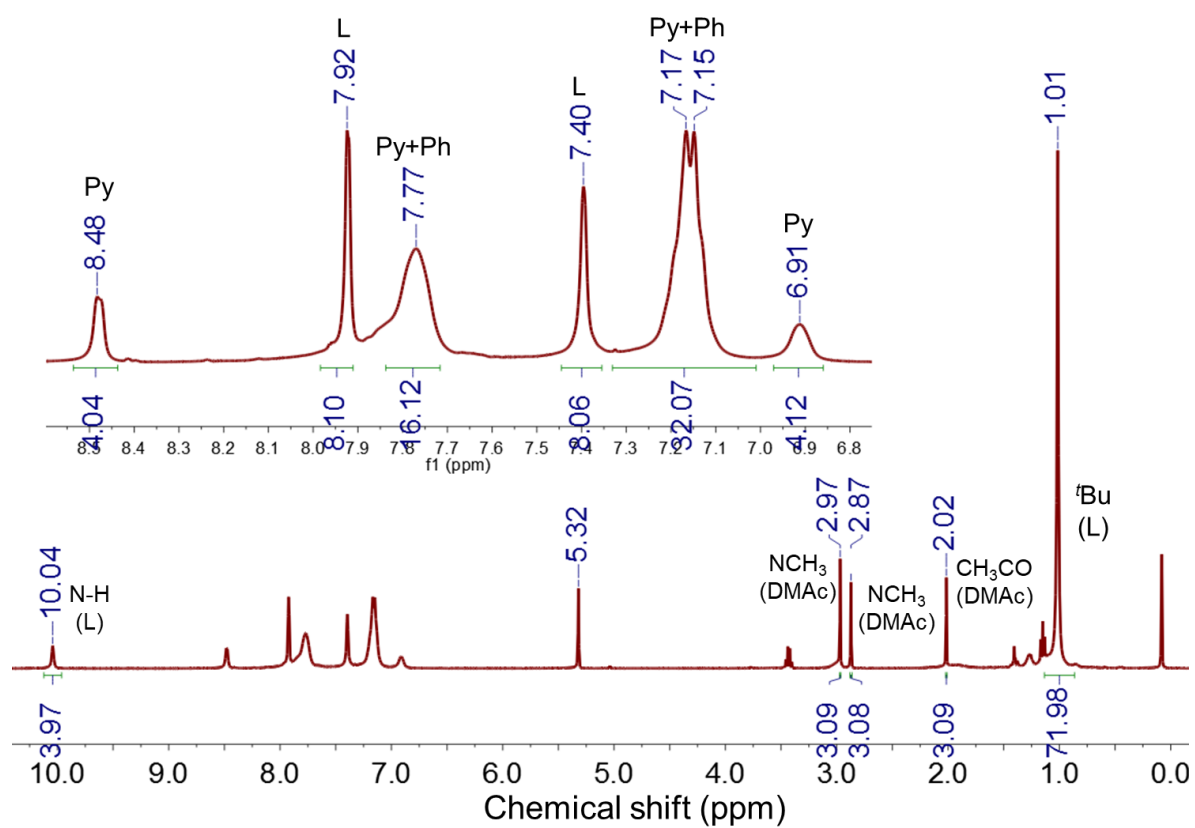

**Figure S5.** The  $^1\text{H}$  NMR spectrum of complex **2** in  $\text{CD}_2\text{Cl}_2$  solution at ambient temperature.

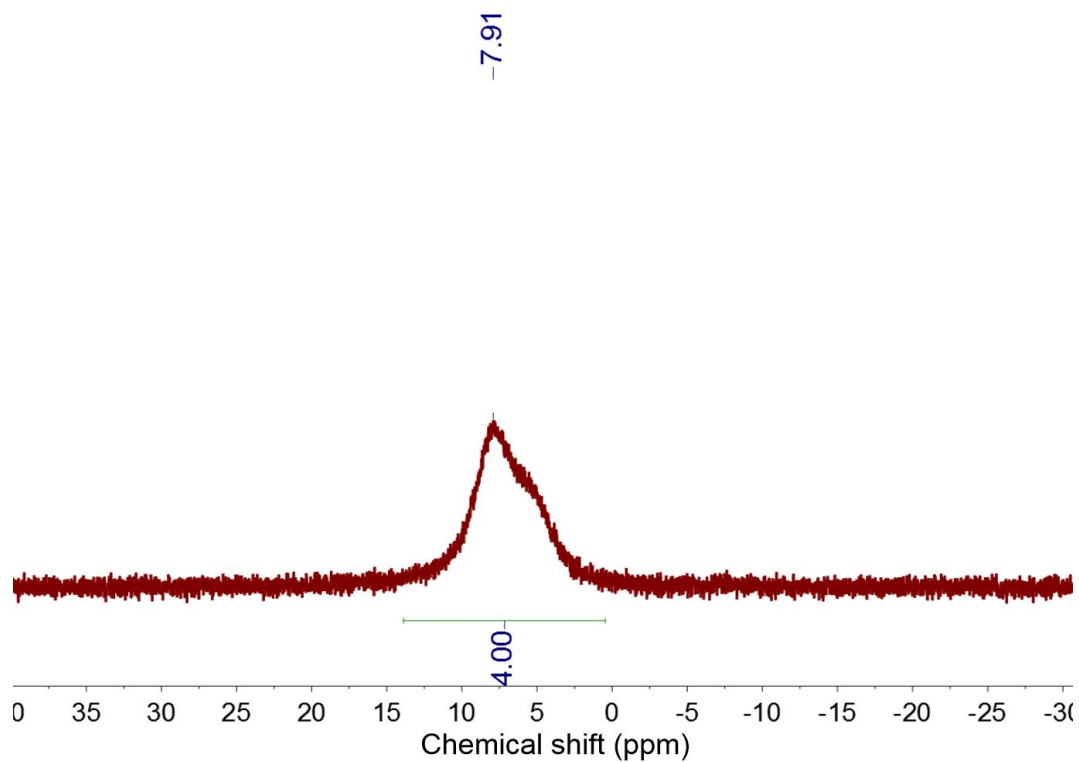

**Figure S6.** The  $^{31}\text{P}$  NMR spectrum of complex **2** in  $\text{CD}_2\text{Cl}_2$  solution at ambient temperature.



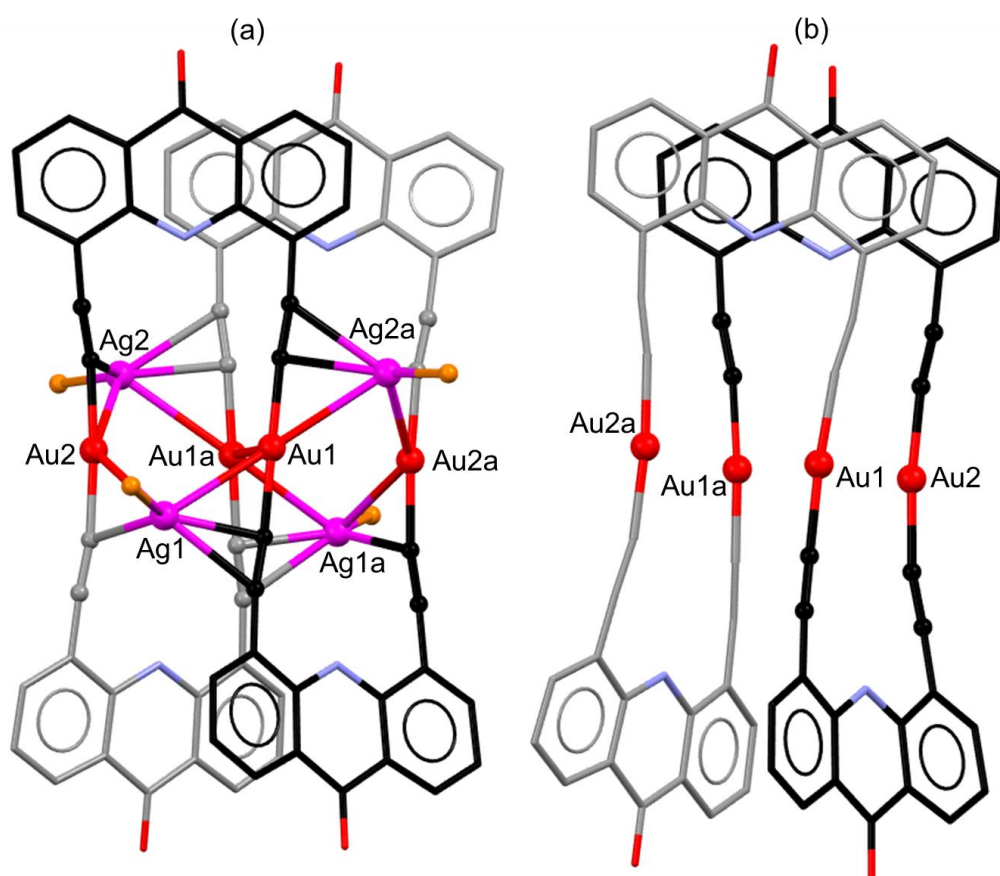

**Figure S7.** (a) A perspective view of  $\text{Au}_4\text{Ag}_4$  complex **2** plotted from X-ray crystallography. The hydrogen atoms and *tert*-butyl groups together with the phenyl and 2-pyridyl rings on phosphorous atoms were omitted for clarity. (b) A view showing a twisted paper clip structure of gold(I)-bis(acetylide) coordination framework.

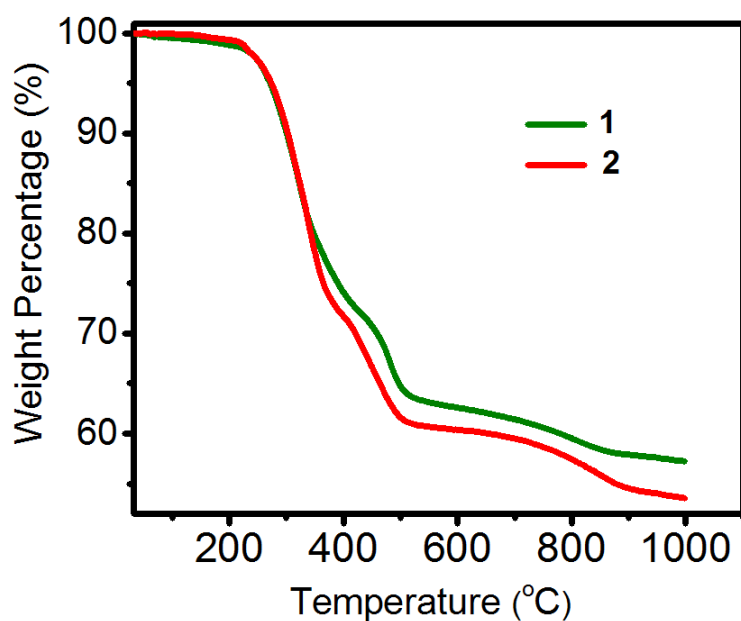

**Figure S8.** The plots of thermogravimetric analyses of complexes **1** and **2**.

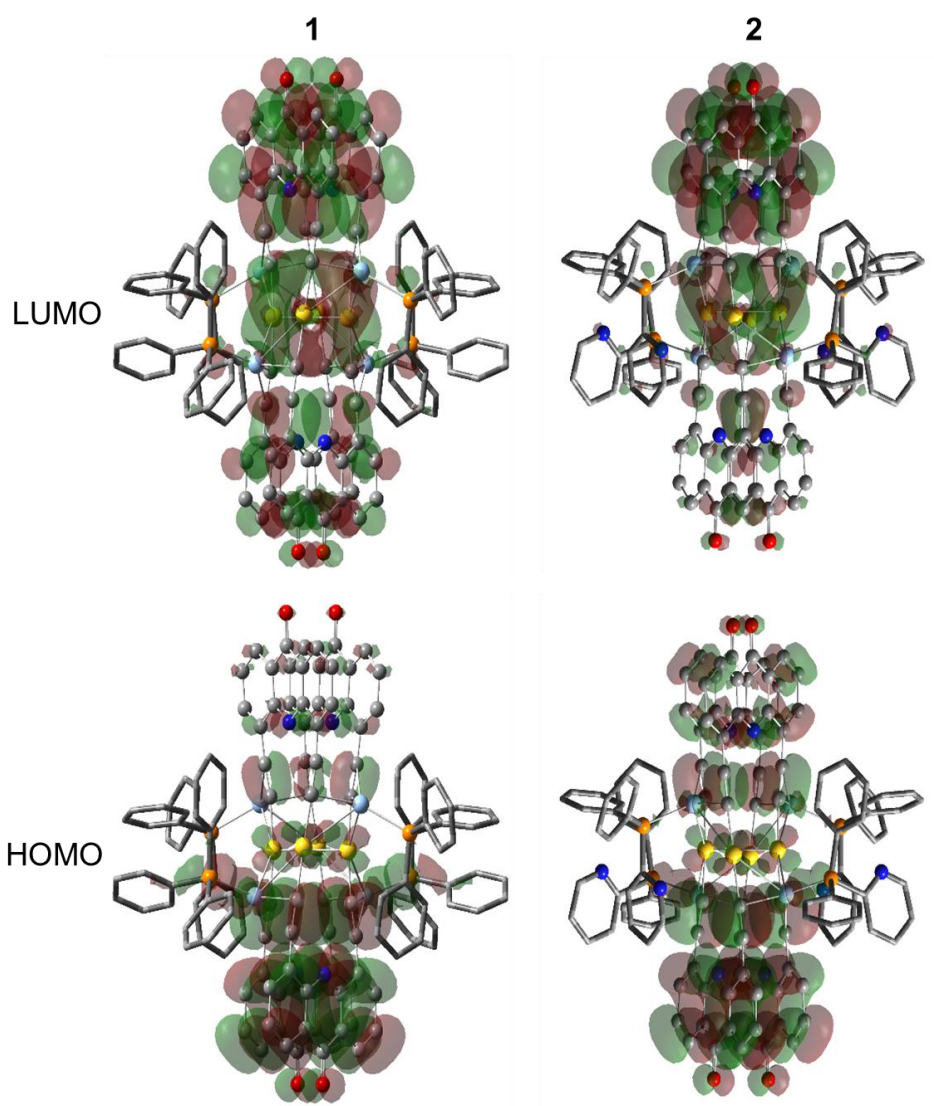

**Figure S9.** Plots of the HOMO and LUMO in the ground state for Au<sub>4</sub>Ag<sub>4</sub> complexes **1** and **2** by TD-DFT method at the PBE1PBE-GD3 level.

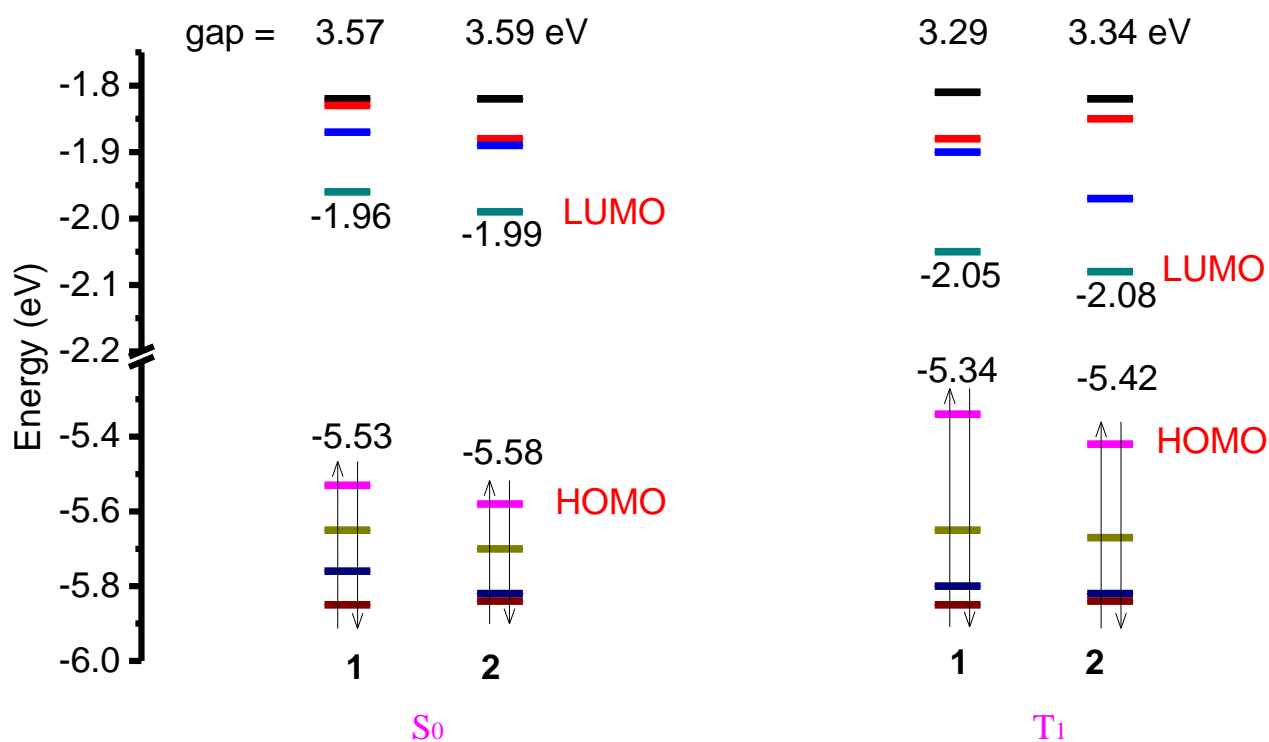

**Figure S10.** Plots of the energy level of frontier molecular orbitals (HOMO-3 ~ LUMO+3) based on the ground ( $S_0$ ) and lowest-energy triplet ( $T_1$ ) state structures of complexes **1** and **2**.

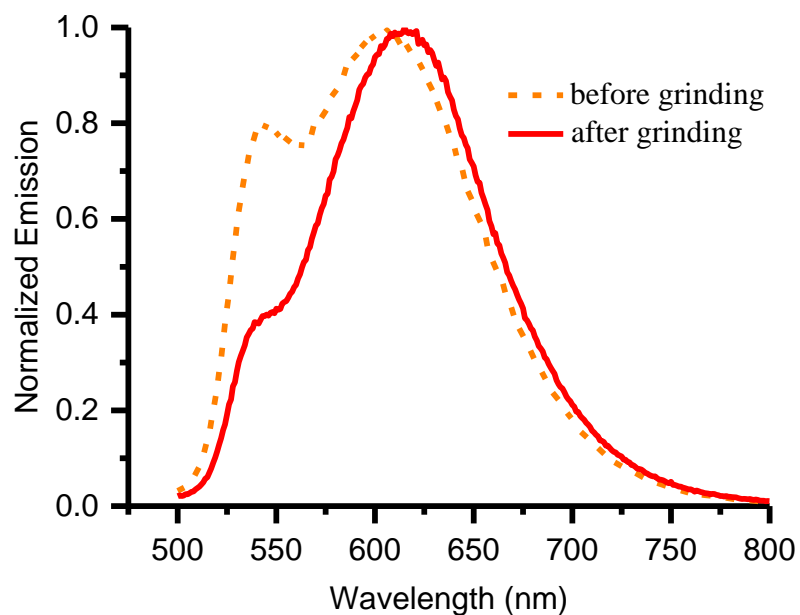

**Figure S11.** The normalized emission spectra of 3%  $\text{Au}_4\text{Ag}_4$  cluster complex **1** in PMMA matrix under UV irradiation (365 nm) before and after mechanical grinding.

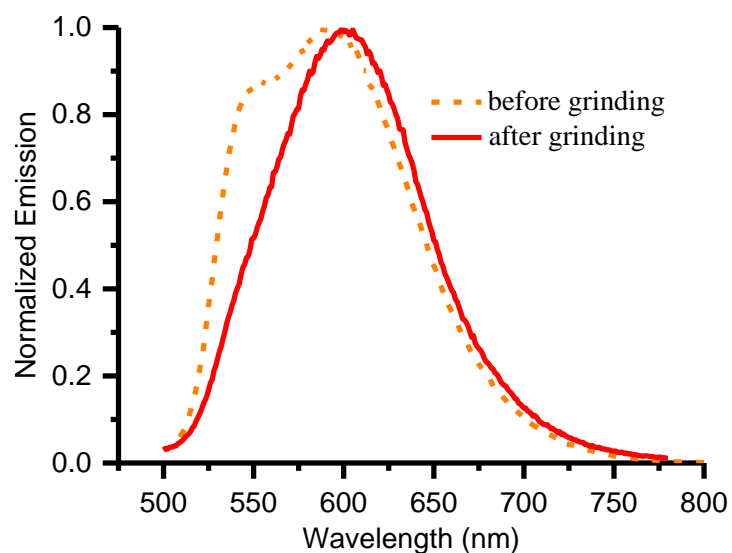

**Figure S12.** The normalized emission spectra of 3% Au<sub>4</sub>Ag<sub>4</sub> cluster complex **2** in PMMA matrix under UV irradiation (365 nm) before and after mechanical grinding.

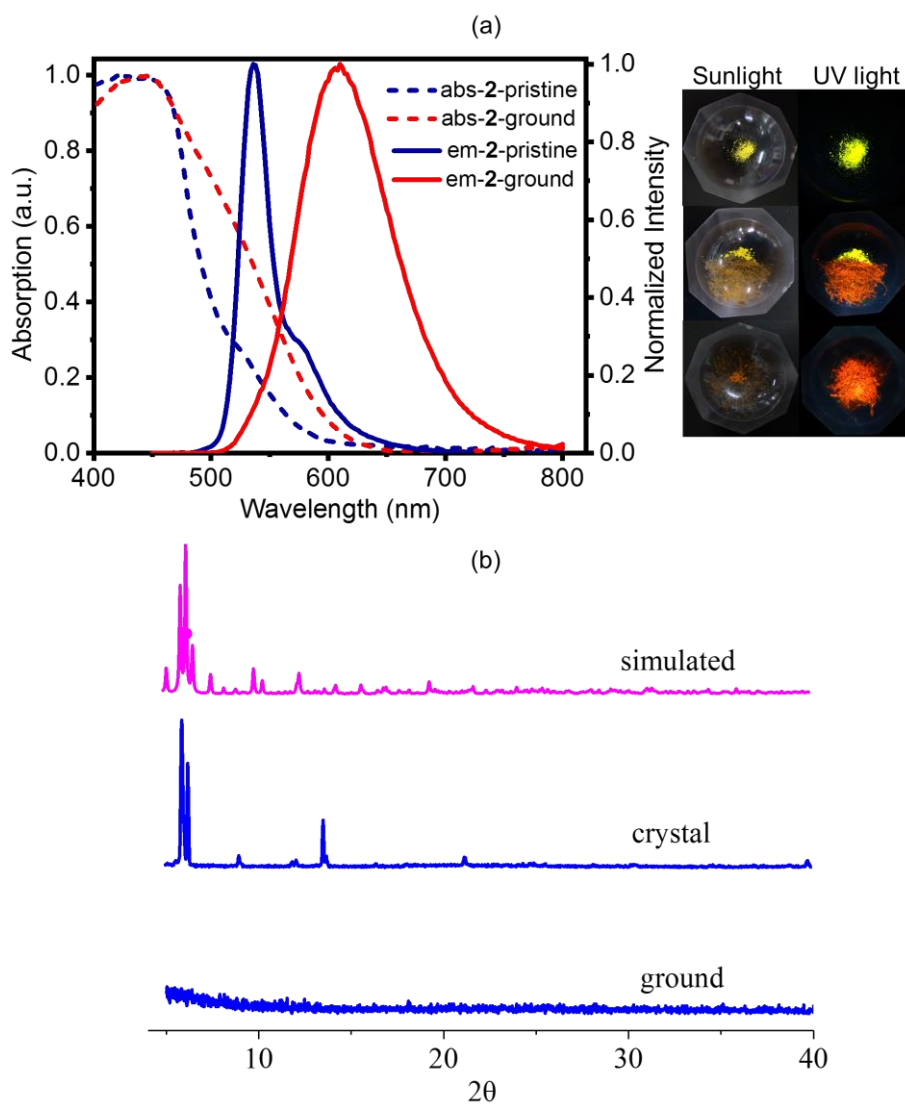

**Figure S13.** (a) The normalized UV-Vis absorption and emission spectra together with the images of Au<sub>4</sub>Ag<sub>4</sub> cluster complex **2** under ambient light and UV irradiation (365 nm) before and after mechanical grinding. (b) The simulated and measured X-ray diffraction patterns of Au<sub>4</sub>Ag<sub>4</sub> cluster complex **2** before and after mechanical grinding.
